# Supplementary material
Source: publisher figshare collection journal article supplement (https://acs.figshare.com/ndownloader/files/14897321)
Supplement: Supplementary file 1 [file 14897321]

Compound	smile	Ki (nM) FPA		Ki (nM) TR-FRET		GI50 (μM)							Caspase3/7	Ki (μM) FPA
		Mcl-1	1% FBS	Mcl-1	1% FBS	H929	K562	AMO-1	MV-4-11	HCC-1187	H-1703	BT-20	EC50 (μM) H929	Bcl-xL	Bcl-2
1	Cc1cc(OCCCc2c3C(=O)N(Cc4cccc(c4)C(=O)N)CCCn3c5c(cccc25)c6c(C)nn(C)c6C)cc(C)c1Cl
2	Cc1cc(OCCCc2c3C(=O)NCCCn3c4c(c(Cl)ccc24)c5c(C)nn(C)c5C)cc(C)c1Cl	12	101
3	Cc1cc(OCCCc2c3C(=O)N(Cc4cccc(c4)C(=O)O)CCCn3c5c(c(Cl)ccc25)c6c(C)nn(C)c6C)cc(C)c1Cl	4.9	18
4	Cc1cc(OCCCc2c3C(=O)N(Cc4ccc(cc4)C(=O)O)CCCn3c5c(c(Cl)ccc25)c6c(C)nn(C)c6C)cc(C)c1Cl	3.3	3.8
5	Cc1cc(OCCCc2c3C(=O)N(Cc4oc(cc4)C(=O)O)CCCn3c5c(c(Cl)ccc25)c6c(C)nn(C)c6C)cc(C)c1Cl	2.9	27
6	CC1CCNC(=O)c2c(CCCOc3cc(C)c(Cl)c(C)c3)c4ccc(Cl)c(c5c(C)nn(C)c5C)c4n12	43	>200
7	CC1CNC(=O)c2c(CCCOc3cc(C)c(Cl)c(C)c3)c4ccc(Cl)c(c5c(C)nn(C)c5C)c4n2C1	42	150
8	CC1CN(Cc2cccc(c2)C(=O)O)C(=O)c3c(CCCOc4cc(C)c(Cl)c(C)c4)c5ccc(Cl)c(c6c(C)nn(C)c6C)c5n3C1	11	144
9	CC1CN(Cc2ccc(cc2)C(=O)O)C(=O)c3c(CCCOc4cc(C)c(Cl)c(C)c4)c5ccc(Cl)c(c6c(C)nn(C)c6C)c5n3C1	7.1	22
10	CC1CN(Cc2oc(cc2)C(=O)O)C(=O)c3c(CCCOc4cc(C)c(Cl)c(C)c4)c5ccc(Cl)c(c6c(C)nn(C)c6C)c5n3C1	7.6	81
11	CC1CCn2c(C(=O)N1)c(CCCOc3cc(C)c(Cl)c(C)c3)c4ccc(Cl)c(c5c(C)nn(C)c5C)c24	70	>200
12	CC1CCn2c(C(=O)N1Cc3cccc(c3)C(=O)O)c(CCCOc4cc(C)c(Cl)c(C)c4)c5ccc(Cl)c(c6c(C)nn(C)c6C)c25	12	>200
13	CC1CCn2c(C(=O)N1Cc3ccc(cc3)C(=O)O)c(CCCOc4cc(C)c(Cl)c(C)c4)c5ccc(Cl)c(c6c(C)nn(C)c6C)c25	6.6	42
14	CC1CCn2c(C(=O)N1Cc3oc(cc3)C(=O)O)c(CCCOc4cc(C)c(Cl)c(C)c4)c5ccc(Cl)c(c6c(C)nn(C)c6C)c25	8.2	120
15	Cc1cc(OCCCc2c3C(=O)NCCn3c4c(c(Cl)ccc24)c5c(C)nn(C)c5C)cc(C)c1Cl	35	>200
16	Cc1cc(OCCCc2c3C(=O)N(Cc4cccc(c4)C(=O)O)CCn3c5c(c(Cl)ccc25)c6c(C)nn(C)c6C)cc(C)c1Cl	9.6	52
17	Cc1cc(OCCCc2c3C(=O)N(Cc4ccc(cc4)C(=O)O)CCn3c5c(c(Cl)ccc25)c6c(C)nn(C)c6C)cc(C)c1Cl	7.2	51
18	Cc1cc(OCCCc2c3C(=O)N(Cc4oc(cc4)C(=O)O)CCn3c5c(c(Cl)ccc25)c6c(C)nn(C)c6C)cc(C)c1Cl	5.8	137
19	C[C@H]1CNC(=O)c2c(CCCOc3cc(C)c(Cl)c(C)c3)c4ccc(Cl)c(c5c(C)nn(C)c5C)c4n12	47	195
20	C[C@H]1CN(Cc2cccc(c2)C(=O)O)C(=O)c3c(CCCOc4cc(C)c(Cl)c(C)c4)c5ccc(Cl)c(c6c(C)nn(C)c6C)c5n13	37	170
21	C[C@H]1CN(Cc2ccc(cc2)C(=O)O)C(=O)c3c(CCCOc4cc(C)c(Cl)c(C)c4)c5ccc(Cl)c(c6c(C)nn(C)c6C)c5n13	35	35
22	C[C@H]1CN(Cc2oc(cc2)C(=O)O)C(=O)c3c(CCCOc4cc(C)c(Cl)c(C)c4)c5ccc(Cl)c(c6c(C)nn(C)c6C)c5n13	22	193
23	C[C@@H]1CNC(=O)c2c(CCCOc3cc(C)c(Cl)c(C)c3)c4ccc(Cl)c(c5c(C)nn(C)c5C)c4n12	15	67
24	C[C@@H]1CN(Cc2cccc(c2)C(=O)O)C(=O)c3c(CCCOc4cc(C)c(Cl)c(C)c4)c5ccc(Cl)c(c6c(C)nn(C)c6C)c5n13	1.1	26
25	C[C@@H]1CN(Cc2ccc(cc2)C(=O)O)C(=O)c3c(CCCOc4cc(C)c(Cl)c(C)c4)c5ccc(Cl)c(c6c(C)nn(C)c6C)c5n13	0.77	6.7
26	C[C@@H]1CN(Cc2oc(cc2)C(=O)O)C(=O)c3c(CCCOc4cc(C)c(Cl)c(C)c4)c5ccc(Cl)c(c6c(C)nn(C)c6C)c5n13	1	26
27	C[C@@H]1Cn2c(C(=O)N1)c(CCCOc3cc(C)c(Cl)c(C)c3)c4ccc(Cl)c(c5c(C)nn(C)c5C)c24	27	151
28	C[C@@H]1Cn2c(C(=O)N1Cc3cccc(c3)C(=O)O)c(CCCOc4cc(C)c(Cl)c(C)c4)c5ccc(Cl)c(c6c(C)nn(C)c6C)c25	2.1	67
29	C[C@@H]1Cn2c(C(=O)N1Cc3ccc(cc3)C(=O)O)c(CCCOc4cc(C)c(Cl)c(C)c4)c5ccc(Cl)c(c6c(C)nn(C)c6C)c25	1.8	53
30	C[C@@H]1Cn2c(C(=O)N1Cc3oc(cc3)C(=O)O)c(CCCOc4cc(C)c(Cl)c(C)c4)c5ccc(Cl)c(c6c(C)nn(C)c6C)c25	5.9	39
31	C[C@H]1Cn2c(C(=O)N1)c(CCCOc3cc(C)c(Cl)c(C)c3)c4ccc(Cl)c(c5c(C)nn(C)c5C)c24	73	145
32	C[C@H]1Cn2c(C(=O)N1Cc3cccc(c3)C(=O)O)c(CCCOc4cc(C)c(Cl)c(C)c4)c5ccc(Cl)c(c6c(C)nn(C)c6C)c25	9.9	97
33	C[C@H]1Cn2c(C(=O)N1Cc3ccc(cc3)C(=O)O)c(CCCOc4cc(C)c(Cl)c(C)c4)c5ccc(Cl)c(c6c(C)nn(C)c6C)c25	9.6	54
34	C[C@H]1Cn2c(C(=O)N1Cc3oc(cc3)C(=O)O)c(CCCOc4cc(C)c(Cl)c(C)c4)c5ccc(Cl)c(c6c(C)nn(C)c6C)c25	8.7	150
35	C[C@@H]1CN(C(=O)c2c(CCCOc3cc(C)c(Cl)c(C)c3)c4ccc(Cl)c(c5c(C)nn(C)c5C)c4n12)c6cccc(c6)C(=O)O			1.4	2.6	4.4	>12.5	3.3	2.3	>12.5	12	6.9	3.1	>40	0.99
36	C[C@@H]1CN(C(=O)c2c(CCCOc3cc(C)c(Cl)c(C)c3)c4ccc(Cl)c(c5c(C)nn(C)c5C)c4n12)c6ccc(cc6)C(=O)O			1.3	4.5	4	>12.5	2.5	2.4	>12.5	11	4.7	2.8	>40	0.69
37	C[C@@H]1CN(C(=O)c2c(CCCOc3cc(C)c(Cl)c(C)c3)c4ccc(Cl)c(c5c(C)nn(C)c5C)c4n12)c6cc(C(=O)O)c7ccn(C)c7c6			0.21	1.5	0.82	>12.5	0.55	0.37	5.5	7	4.1	0.91	>40	0.77
38	C[C@@H]1CN(C(=O)c2c(CCCOc3cc(C)c(Cl)c(C)c3)c4ccc(Cl)c(c5c(C)nn(C)c5C)c4n12)c6cc(cc7c6ccn7C)C(=O)O			1.3	6.8	2.1	>12.5	7.1	1	>12.5	9.4	11	2.2	>40	0.63
39	C[C@@H]1CN(C(=O)c2c(CCCOc3cc(C)c(Cl)c(C)c3)c4ccc(Cl)c(c5c(C)nn(C)c5C)c4n12)c6cc(cc7OCOc67)C(=O)O			0.42	1.4	1.7	>12.5	1.4	0.58	7.3	7.7	6.4	0.95	25	0.63
40	C[C@@H]1CN(C(=O)c2c(CCCOc3cc(C)c(Cl)c(C)c3)c4ccc(Cl)c(c5c(C)nn(C)c5C)c4n12)c6cccc7c(cccc67)C(=O)O			0.33	0.77	0.65	2.5	0.36	0.27	5.2	4.3	2.8	0.66	26	0.38
41	C[C@@H]1CN(C(=O)c2c(CCCOc3cc(C)c(Cl)c(C)c3)c4ccc(Cl)c(c5c(C)nn(C)c5C)c4n12)c6cn(C)c7cc(ccc67)C(=O)O			0.081	0.38	0.29	>12.5	0.22	0.12	2.7	3.3	2	0.34	>40	0.5
42	C[C@@H]1CN(C(=O)c2c(CCCOc3cc(C)c(Cl)c(C)c3)c4ccc(Cl)c(c5c(C)nn(C)c5C)c4n12)c6cn(C)c7ccc(cc67)C(=O)O			0.03	0.25	0.19	9.3	0.14	0.067	1.3	2.1	1.1	0.16	>40	0.73
P-42	ClC1=CC=C(C(CCOC2=CC(C)=C(Cl)C(C)=C2)=C3N4[C@H](C)CN(C5=CN(C)C6=C5C=C(C(O)=O)C=C6)C3=O)C4=[C@]1[C@]7=C(C)N(C)N=C7C			0.058	0.18	0.12	9.2	0.1	0.088	0.92	1.8	0.83	0.13	>40	1.3
M-42	ClC1=CC=C(C(CCOC2=CC(C)=C(Cl)C(C)=C2)=C3N4[C@H](C)CN(C5=CN(C)C6=C5C=C(C(O)=O)C=C6)C3=O)C4=[C@@]1[C@@]7=C(C)N(C)N=C7C			0.058	0.19	0.12	9.2	0.097	0.075	0.88	1.6	0.72	0.11	>40	1.3
43	C[C@H]1CN(C(=O)c2c(CCCOc3cc(C)c(Cl)c(C)c3)c4ccc(Cl)c(c5c(C)nn(C)c5C)c4n12)c6cn(C)c7ccc(cc67)C(=O)O			1.6	6.1	3.6	>12.5	2.3	1.8	>12.5	>12.5	>12.5	2.8
